# Supplementary material
Source: publisher figshare collection journal article supplement (https://acs.figshare.com/ndownloader/files/3831343)
Supplement: Supplementary file 1 [file 3831343]

# Highly Tunable Interfacial Adhesion of Glass Fiber by Hybrid Multilayers of Graphene Oxide and Aramid Nanofiber

Byeongho Park,<sup>1†</sup> Wonoh Lee,<sup>2†</sup> Eunhee Lee,<sup>1</sup> Sa Hoon Min,<sup>1</sup> and Byeong-Su Kim<sup>1\*</sup>

<sup>1</sup> Department of Chemistry and Department of Energy Engineering, Low Dimensional Carbon Materials Center, Ulsan National Institute of Science and Technology (UNIST), Ulsan 689-798, Korea

<sup>2</sup> Composites Research Center, Korea Institute of Materials Science (KIMS), 797 Changwondaero, Changwon, Gyungnam 642-831, Korea

<sup>†</sup>These authors contributed equally to this work.

E-mail: bskim19@unist.ac.kr

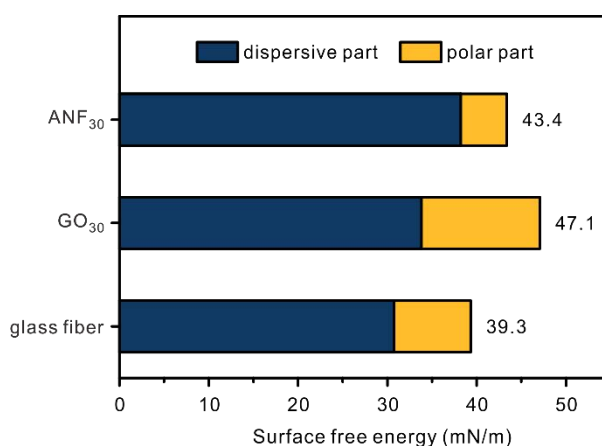

**Figure S1.** Surface free energy (SFE) of bare glass fiber, GO<sub>30</sub> (glass fiber/(GO/PSS)<sub>30</sub>), and ANF<sub>30</sub> (glass fiber/(PDAC/ANF)<sub>30</sub>).

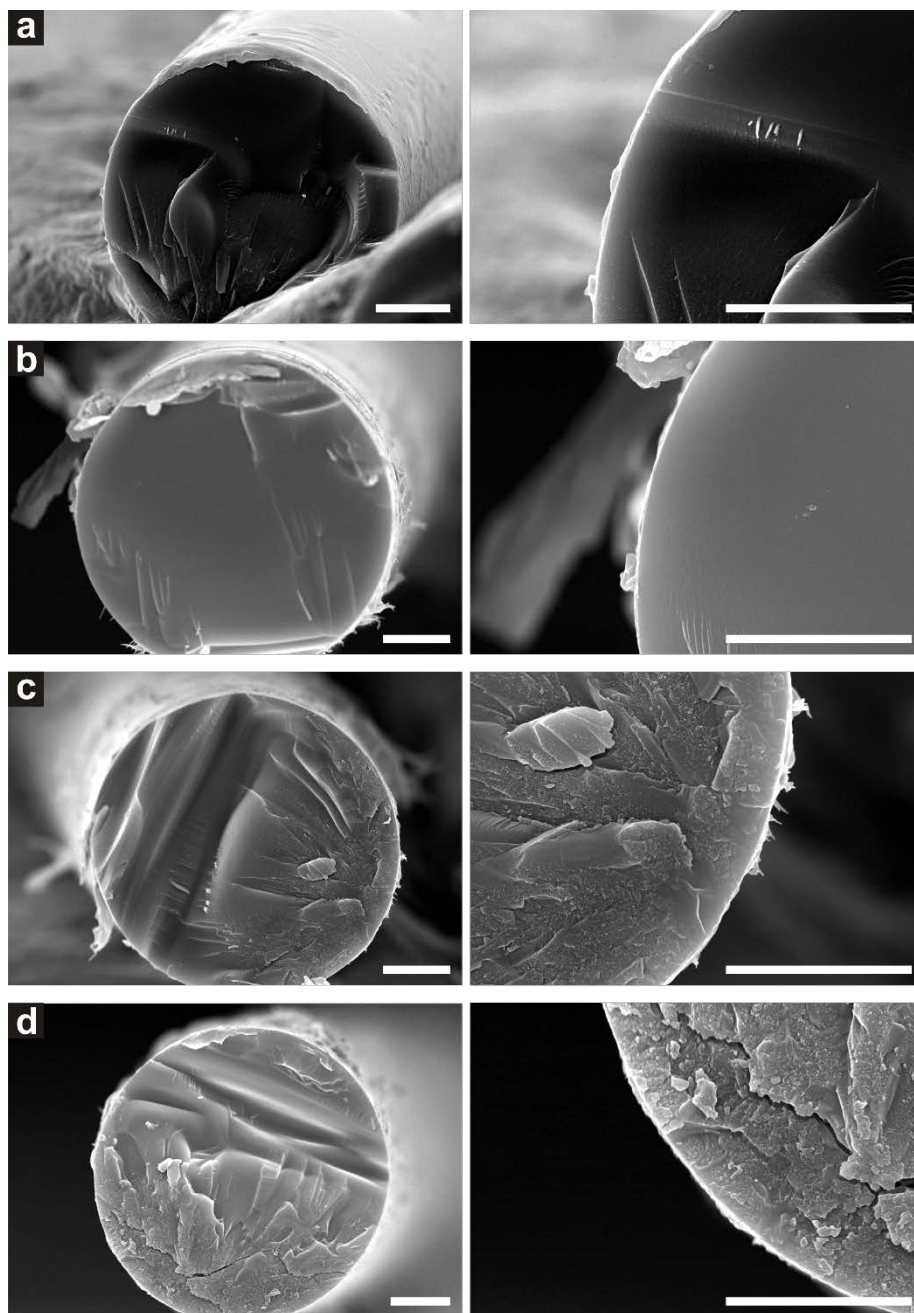

**Figure S2.** Cross-section SEM images of multilayer-coated glass fiber of (a)  $\text{GO}_{10}$ , (b)  $\text{ANF}_{10}$ , (c)  $(\text{GO}/\text{ANF})_{10}$ , and (d)  $\text{ANF}_5/\text{GO}_5$ . The scale bars are 5  $\mu\text{m}$ .
